# Supplementary material
Source: ML conference proceedings conference paper supplement (https://proceedings.neurips.cc/paper_files/paper/2020/hash/1896a3bf730516dd643ba67b4c447d36-Abstract.html)
Supplement: Supplementary file [file 1896a3bf730516dd643ba67b4c447d36-Supplemental.pdf]

## A Proofs

### A.1 Proof for Theorem 1

#### A.1.1 Proof for (I) and (II)

First, observe that the constraint in Equation (3) can be equivalently replaced by an inequality constraint  $f_{\pi_0}(\mathbf{x}_0) \geq f_{\pi_0}^\sharp(\mathbf{x}_0)$ . Therefore, the Lagrangian multiplier can be restricted to be  $\lambda \geq 0$ . We have

$$\begin{aligned} \mathcal{L}_{\pi_0}(\mathcal{F}, \mathcal{B}) &= \min_{\delta \in \mathcal{B}} \min_{f \in \mathcal{F}} \max_{\lambda \geq 0} \mathbb{E}_{\pi_\delta} [f(\mathbf{x}_0 + \mathbf{z})] + \lambda (f_{\pi_0}^\sharp(\mathbf{x}_0) - \mathbb{E}_{\pi_0} [f(\mathbf{x}_0 + \mathbf{z})]) \\ &\geq \max_{\lambda \geq 0} \min_{\delta \in \mathcal{B}} \min_{f \in \mathcal{F}} \mathbb{E}_{\pi_\delta} [f(\mathbf{x}_0 + \mathbf{z})] + \lambda (f_{\pi_0}^\sharp(\mathbf{x}_0) - \mathbb{E}_{\pi_0} [f(\mathbf{x}_0 + \mathbf{z})]) \\ &= \max_{\lambda \geq 0} \min_{\delta \in \mathcal{B}} \left\{ \lambda f_{\pi_0}^\sharp(\mathbf{x}_0) + \min_{f \in \mathcal{F}} \mathbb{E}_{\pi_\delta} [f(\mathbf{x}_0 + \mathbf{z})] - \lambda \mathbb{E}_{\pi_0} [f(\mathbf{x}_0 + \mathbf{z})] \right\} \\ &= \max_{\lambda \geq 0} \min_{\delta \in \mathcal{B}} \left\{ \lambda f_{\pi_0}^\sharp(\mathbf{x}_0) - \mathbb{D}_{\mathcal{F}}(\lambda \pi_0 \parallel \pi_\delta) \right\}. \end{aligned}$$

II) follows a straightforward calculation.

#### A.1.2 Proof for (III), the strong duality

We first introduce the following lemma, which is a straight forward generalization of the strong Lagrange duality to functional optimization case.

**Lemma 1.** *Given some  $\delta^*$ , we have*

$$\begin{aligned} &\max_{\lambda \in \mathbb{R}} \min_{f \in \mathcal{F}_{[0,1]}} \mathbb{E}_{\pi_{\delta^*}} [f(\mathbf{x}_0 + \mathbf{z})] + \lambda (f_{\pi_0}^\sharp(\mathbf{x}_0) - \mathbb{E}_{\pi_0} [f(\mathbf{x}_0 + \mathbf{z})]) \\ &= \min_{f \in \mathcal{F}_{[0,1]}} \max_{\lambda \in \mathbb{R}} \mathbb{E}_{\pi_{\delta^*}} [f(\mathbf{x}_0 + \mathbf{z})] + \lambda (f_{\pi_0}^\sharp(\mathbf{x}_0) - \mathbb{E}_{\pi_0} [f(\mathbf{x}_0 + \mathbf{z})]). \end{aligned}$$

The proof of Lemma 1 is standard. However, for completeness, we include it here.

*Proof.* Without loss of generality, we assume  $f_{\pi_0}^\sharp(\mathbf{x}_0) \in (0, 1)$ , otherwise the feasible set is trivial.

Let  $\alpha^*$  be the value of the optimal solution of the primal problem. We define  $f_{\pi_0}^\sharp(\mathbf{x}_0) - \mathbb{E}_{\pi_0} [f(\mathbf{x}_0 + \mathbf{z})] = h[f]$  and  $g[f] = \mathbb{E}_{\pi_{\delta^*}} [f(\mathbf{x}_0 + \mathbf{z})]$ . We define the following two sets:

$$\begin{aligned} \mathcal{A} &= \{(v, t) \in \mathbb{R} \times \mathbb{R} : \exists f \in \mathcal{F}_{[0,1]}, h[f] = v, g[f] \leq t\} \\ \mathcal{B} &= \{(0, s) \in \mathbb{R} \times \mathbb{R} : s < \alpha^*\}. \end{aligned}$$

Notice that both sets  $\mathcal{A}$  and  $\mathcal{B}$  are convex. This is obvious for  $\mathcal{B}$ . For any  $(v_1, t_1) \in \mathcal{A}$  and  $(v_2, t_2) \in \mathcal{A}$ , we define  $f_1 \in \mathcal{F}_{[0,1]}$  such that  $h[f_1] = v_1, g[f_1] \leq t_1$  (and similarly we define  $f_2$ ). Notice that for any  $\gamma \in [0, 1]$ , we have

$$\begin{aligned} \gamma f_1 + (1 - \gamma) f_2 &\in \mathcal{F}_{[0,1]} \\ \gamma h[f_1] + (1 - \gamma) h[f_2] &= \gamma v_1 + (1 - \gamma) v_2 \\ \gamma g[f_1] + (1 - \gamma) g[f_2] &\leq \gamma t_1 + (1 - \gamma) t_2, \end{aligned}$$

which implies that  $\gamma(v_1, t_1) + (1 - \gamma)(v_2, t_2) \in \mathcal{A}$  and thus  $\mathcal{A}$  is convex. Also notice that by definition,  $\mathcal{A} \cap \mathcal{B} = \emptyset$ . Using separating hyperplane theorem, there exists a point  $(q_1, q_2) \neq (0, 0)$  and a value  $\alpha$  such that for any  $(v, t) \in \mathcal{A}$ ,  $q_1 v + q_2 t \geq \alpha$  and for any  $(0, s) \in \mathcal{B}$ ,  $q_2 s \leq \alpha$ . Notice that we must have  $q_2 \geq 0$ , otherwise, for sufficient  $s$ , we will have  $q_2 s > \alpha$ . We thus have, for any  $f \in \mathcal{F}_{[0,1]}$ , we have

$$q_1 h[f] + q_2 g[f] \geq \alpha^* \geq q_2 \alpha^*.$$

If  $q_2 > 0$ , we have

$$\max_{\lambda \in \mathbb{R}} \min_{f \in \mathcal{F}_{[0,1]}} g[f] + \lambda h[f] \geq \min_{f \in \mathcal{F}_{[0,1]}} g[f] + \frac{q_1}{q_2} h[f] \geq \alpha^*,$$

which gives the strong duality. If  $q_2 = 0$ , we have for any  $f \in \mathcal{F}_{[0,1]}$ ,  $q_1 h[f] \geq 0$  and by the separating hyperplane theorem,  $q_1 \neq 0$ . However, this case is impossible: If  $q_1 > 0$ , choosing

$f \equiv 1$  gives  $q_1 h[f] = q_1 (f_{\pi_0}^\#(\mathbf{x}_0) - 1) < 0$ ; If  $q_1 < 0$ , by choosing  $f \equiv 0$ , we have  $q_1 h[f] = q_1 (f_{\pi_0}^\#(\mathbf{x}_0) - 0) < 0$ . Both cases give contradiction.  $\square$

Based on Lemma 1, we have the proof of the strong duality as follows.

Notice that by Lagrange multiplier method, our primal problem can be rewritten as follows:

$$\min_{\delta \in \mathcal{B}} \min_{f \in \mathcal{F}_{[0,1]}} \max_{\lambda \in \mathbb{R}} \mathbb{E}_{\pi_\delta} [f(\mathbf{x}_0 + \mathbf{z})] + \lambda (f_{\pi_0}^\#(\mathbf{x}_0) - \mathbb{E}_{\pi_0} [f(\mathbf{x}_0 + \mathbf{z})]),$$

and the dual problem is

$$\begin{aligned} & \max_{\lambda \in \mathbb{R}} \min_{\delta \in \mathcal{B}} \min_{f \in \mathcal{F}_{[0,1]}} \mathbb{E}_{\pi_\delta} [f(\mathbf{x}_0 + \mathbf{z})] + \lambda (f_{\pi_0}^\#(\mathbf{x}_0) - \mathbb{E}_{\pi_0} [f(\mathbf{x}_0 + \mathbf{z})]) \\ &= \max_{\lambda \geq 0} \min_{\delta \in \mathcal{B}} \min_{f \in \mathcal{F}_{[0,1]}} \mathbb{E}_{\pi_\delta} [f(\mathbf{x}_0 + \mathbf{z})] + \lambda (f_{\pi_0}^\#(\mathbf{x}_0) - \mathbb{E}_{\pi_0} [f(\mathbf{x}_0 + \mathbf{z})]). \end{aligned}$$

By the assumption that for any  $\lambda \geq 0$ , we have

$$\begin{aligned} & \max_{\lambda \geq 0} \min_{\delta \in \mathcal{B}} \min_{f \in \mathcal{F}_{[0,1]}} \mathbb{E}_{\pi_\delta} [f(\mathbf{x}_0 + \mathbf{z})] + \lambda (f_{\pi_0}^\#(\mathbf{x}_0) - \mathbb{E}_{\pi_0} [f(\mathbf{x}_0 + \mathbf{z})]) \\ &= \max_{\lambda \geq 0} \min_{f \in \mathcal{F}_{[0,1]}} \mathbb{E}_{\pi_{\delta^*}} [f(\mathbf{x}_0 + \mathbf{z})] + \lambda (f_{\pi_0}^\#(\mathbf{x}_0) - \mathbb{E}_{\pi_0} [f(\mathbf{x}_0 + \mathbf{z})]), \end{aligned}$$

for some  $\delta^* \in \mathcal{B}$ . We have

$$\begin{aligned} & \max_{\lambda \in \mathbb{R}} \min_{\delta \in \mathcal{B}} \min_{f \in \mathcal{F}_{[0,1]}} \mathbb{E}_{\pi_\delta} [f(\mathbf{x}_0 + \mathbf{z})] + \lambda (f_{\pi_0}^\#(\mathbf{x}_0) - \mathbb{E}_{\pi_0} [f(\mathbf{x}_0 + \mathbf{z})]) \\ &= \max_{\lambda \geq 0} \min_{f \in \mathcal{F}_{[0,1]}} \mathbb{E}_{\pi_{\delta^*}} [f(\mathbf{x}_0 + \mathbf{z})] + \lambda (f_{\pi_0}^\#(\mathbf{x}_0) - \mathbb{E}_{\pi_0} [f(\mathbf{x}_0 + \mathbf{z})]) \\ &= \max_{\lambda \in \mathbb{R}} \min_{f \in \mathcal{F}_{[0,1]}} \mathbb{E}_{\pi_{\delta^*}} [f(\mathbf{x}_0 + \mathbf{z})] + \lambda (f_{\pi_0}^\#(\mathbf{x}_0) - \mathbb{E}_{\pi_0} [f(\mathbf{x}_0 + \mathbf{z})]) \\ &\stackrel{*}{=} \min_{f \in \mathcal{F}_{[0,1]}} \max_{\lambda \in \mathbb{R}} \mathbb{E}_{\pi_{\delta^*}} [f(\mathbf{x}_0 + \mathbf{z})] + \lambda (f_{\pi_0}^\#(\mathbf{x}_0) - \mathbb{E}_{\pi_0} [f(\mathbf{x}_0 + \mathbf{z})]) \\ &\geq \min_{\delta \in \mathcal{B}} \min_{f \in \mathcal{F}_{[0,1]}} \max_{\lambda \in \mathbb{R}} \mathbb{E}_{\pi_{\delta^*}} [f(\mathbf{x}_0 + \mathbf{z})] + \lambda (f_{\pi_0}^\#(\mathbf{x}_0) - \mathbb{E}_{\pi_0} [f(\mathbf{x}_0 + \mathbf{z})]), \end{aligned}$$

where the second equality (\*) is by Lemma 1.

## A.2 Proof for Corollary 1

*Proof.* Given our confidence lower bound

$$\max_{\lambda \geq 0} \min_{\|\delta\|_1 \leq r} \left\{ \lambda p_0 - \int (\lambda \pi_0(z) - \pi_\delta(z))_+ dz \right\},$$

One can show that the worst case for  $\delta$  is obtained when  $\delta^* = (r, 0, \dots, 0)$  (see following subsection), thus the bound is

$$\max_{\lambda \geq 0} \left\{ \lambda p_0 - \int \frac{1}{2b} \exp\left(-\frac{|z_1|}{b}\right) \left[ \lambda - \exp\left(\frac{|z_1| - |z_1 + r|}{b}\right) \right]_+ dz_1 \right\}.$$

Denote  $a$  to be the solution of  $\lambda = \exp\left(\frac{|a| - |a+r|}{b}\right)$ , then obviously we have

$$a = \begin{cases} -\infty, & b \log \lambda \geq r \\ -\frac{1}{2}(b \log \lambda + r), & -r < b \log \lambda < r \\ +\infty. & b \log \lambda \leq -r \end{cases}$$

So the bound above is

$$\lambda \int_{z_1 > a} \frac{1}{2b} \exp\left(-\frac{|z_1|}{b}\right) dz_1 - \int_{z_1 > a} \frac{1}{2b} \exp\left(-\frac{|z_1 + r|}{b}\right) dz_1.$$

i)  $b \log \lambda \geq r \Leftrightarrow \lambda \geq \exp\left(\frac{r}{b}\right)$   
the bound is

$$\max_{\lambda \geq e^{r/b}} \{\lambda p_0 - (\lambda - 1)\} = 1 - \exp\left(\frac{r}{b}\right) (1 - p_0).$$

ii)  $-r < b \log \lambda < r \Leftrightarrow \exp\left(-\frac{r}{b}\right) < \lambda < \exp\left(\frac{r}{b}\right)$   
the bound is

$$\begin{aligned} & \max_{\lambda} \left\{ \lambda p_0 - \lambda \left[ 1 - \frac{1}{2} \exp\left(-\frac{b \log \lambda + r}{2b}\right) \right] + \frac{1}{2} \exp\left(\frac{b \log \lambda - r}{2b}\right) \right\} \\ &= \max_{\lambda} \left\{ \lambda(p_0 - 1) + \frac{\lambda}{2} \exp\left(-\frac{b \log \lambda + r}{2b}\right) + \frac{1}{2} \exp\left(\frac{b \log \lambda - r}{2b}\right) \right\} \\ &= \frac{1}{2} \exp\left(-\log[2(1 - p_0)] - \frac{r}{b}\right). \end{aligned}$$

the extremum is achieved when  $\hat{\lambda} = \exp\left(-2 \log[2(1 - p_0)] - \frac{r}{b}\right)$ . Notice that  $\hat{\lambda}$  does not necessarily locate in  $(e^{-r/b}, e^{r/b})$ , so the actual bound is always equal or less than  $\frac{1}{2} \exp\left(-\log[2(1 - p_0)] - \frac{r}{b}\right)$ .

iii)  $b \log \lambda \leq -r \Leftrightarrow \lambda \leq \exp\left(-\frac{r}{b}\right)$   
the bound is

$$\max_{\lambda \leq \exp\left(-\frac{r}{b}\right)} \lambda \cdot p_0 = p_0 \exp\left(-\frac{r}{b}\right).$$

Since  $\hat{\lambda} > e^{r/b} \Leftrightarrow p_0 > 1 - \frac{1}{2} \exp\left(-\frac{r}{b}\right)$ , notice that the lower bound is a concave function w.r.t.  $\lambda$ , making the final lower bound become

$$\begin{cases} 1 - \exp\left(\frac{r}{b}\right) (1 - p_0), & \text{when } p_0 > 1 - \frac{1}{2} \exp\left(-\frac{r}{b}\right) \\ \frac{1}{2} \exp\left(-\log[2(1 - p_0)] - \frac{r}{b}\right). & \text{otherwise} \end{cases}$$

□

**Remark** Actually, we have  $1 - \exp\left(\frac{r}{b}\right) (1 - p_0) \leq \frac{1}{2} \exp\left(-\log[2(1 - p_0)] - \frac{r}{b}\right)$  all the time. Another interesting thing is that both the bound can lead to the same radius bound:

$$\begin{aligned} 1 - \exp\left(\frac{r}{b}\right) (1 - p_0) > \frac{1}{2} &\Leftrightarrow r < -b \log[2(1 - p_0)] \\ \frac{1}{2} \exp\left(-\log[2(1 - p_0)] - \frac{r}{b}\right) > \frac{1}{2} &\Leftrightarrow r < -b \log[2(1 - p_0)] \end{aligned}$$

### A.3 Proof for Corollary 2

*Proof.* With strong duality, our confidence lower bound is

$$\min_{\|\boldsymbol{\delta}\|_2 \leq r} \max_{\lambda \geq 0} \left\{ \lambda p_0 - \int (\lambda \pi_{\mathbf{0}}(z) - \pi_{\boldsymbol{\delta}}(z))_+ dz \right\},$$

define  $C_\lambda = \{z : \lambda \pi_{\mathbf{0}}(z) \geq \pi_{\boldsymbol{\delta}}(z)\} = \{z : \boldsymbol{\delta}^\top z \leq \frac{\|\boldsymbol{\delta}\|_2^2}{2} + \sigma^2 \ln \lambda\}$  and  $\Phi(\cdot)$  to be the cdf of standard gaussian distribution, then

$$\begin{aligned} & \int (\lambda \pi_{\mathbf{0}}(z) - \pi_{\boldsymbol{\delta}}(z))_+ dz \\ &= \int_{C_\lambda} (\lambda \pi_{\mathbf{0}}(z) - \pi_{\boldsymbol{\delta}}(z)) dz \\ &= \lambda \cdot \mathbb{P}(N(z; \mathbf{0}, \sigma^2 \mathbf{I}) \in C_\lambda) - \mathbb{P}(N(z; \boldsymbol{\delta}, \sigma^2 \mathbf{I}) \in C_\lambda) \\ &= \lambda \cdot \Phi\left(\frac{\|\boldsymbol{\delta}\|_2}{2\sigma} + \frac{\sigma \ln \lambda}{\|\boldsymbol{\delta}\|_2}\right) - \Phi\left(\frac{-\|\boldsymbol{\delta}\|_2}{2\sigma} + \frac{\sigma \ln \lambda}{\|\boldsymbol{\delta}\|_2}\right). \end{aligned}$$

Define

$$F(\boldsymbol{\delta}, \lambda) := \lambda p_0 - \int (\lambda \pi_{\mathbf{0}}(z) - \pi_{\boldsymbol{\delta}}(z))_+ dz = \lambda p_0 - \lambda \cdot \Phi \left( \frac{\|\boldsymbol{\delta}\|_2}{2\sigma} + \frac{\sigma \ln \lambda}{\|\boldsymbol{\delta}\|_2} \right) + \Phi \left( \frac{-\|\boldsymbol{\delta}\|_2}{2\sigma} + \frac{\sigma \ln \lambda}{\|\boldsymbol{\delta}\|_2} \right).$$

For  $\forall \boldsymbol{\delta}$ ,  $F$  is a concave function w.r.t.  $\lambda$ , as  $F$  is actually a summation of many concave piece wise linear function. See [33] for more discussions of properties of concave functions.

Define  $\hat{\lambda}_{\boldsymbol{\delta}} = \exp \left( \frac{2\sigma \|\boldsymbol{\delta}\|_2 \Phi^{-1}(p_0) - \|\boldsymbol{\delta}\|_2^2}{2\sigma^2} \right)$ , simple calculation can show  $\frac{\partial F(\boldsymbol{\delta}, \lambda)}{\partial \lambda} \Big|_{\lambda=\hat{\lambda}_{\boldsymbol{\delta}}} = 0$ , which means

$$\begin{aligned} \min_{\|\boldsymbol{\delta}\|_2 \leq r} \max_{\lambda \geq 0} F(\boldsymbol{\delta}, \lambda) &= \min_{\|\boldsymbol{\delta}\|_2 \leq r} F(\boldsymbol{\delta}, \lambda_{\boldsymbol{\delta}}) \\ &= \min_{\|\boldsymbol{\delta}\|_2 \leq r} \left\{ 0 + \Phi \left( \frac{-\|\boldsymbol{\delta}\|_2}{2\sigma} + \frac{\sigma \ln \hat{\lambda}_{\boldsymbol{\delta}}}{\|\boldsymbol{\delta}\|_2} \right) \right\} \\ &= \min_{\|\boldsymbol{\delta}\|_2 \leq r} \Phi \left( \Phi^{-1}(p_0) - \frac{\|\boldsymbol{\delta}\|_2}{\sigma} \right) \\ &= \Phi \left( \Phi^{-1}(p_0) - \frac{r}{\sigma} \right) \end{aligned}$$

This tells us

$$\min_{\|\boldsymbol{\delta}\|_2 \leq r} \max_{\lambda \geq 0} F(\boldsymbol{\delta}, \lambda) > 1/2 \Leftrightarrow \Phi \left( \Phi^{-1}(p_0) - \frac{r}{\sigma} \right) > 1/2 \Leftrightarrow r < \sigma \cdot \Phi^{-1}(p_0),$$

i.e. the certification radius is  $\sigma \cdot \Phi^{-1}(p_0)$ . This is exactly the core theoretical contribution of [9]. This bound has a straight forward expansion for multi-class classification situations, we refer interesting readers to Appendix C.  $\square$

## A.4 Proof For Theorem 2 and 3

### A.4.1 Proof for $\ell_2$ and $\ell_{\infty}$ cases

Here we consider a more general smooth distribution  $\pi_{\mathbf{0}}(\mathbf{z}) \propto \|\mathbf{z}\|_{\infty}^{-k_1} \|\mathbf{z}\|_2^{-k_2} \exp \left( -\frac{\|\mathbf{z}\|_2^2}{2\sigma^2} \right)$ , for some  $k_1, k_2 \geq 0$  and  $\sigma > 0$ . We first gives the following key theorem shows that  $\mathbb{D}_{\mathcal{F}_{[0,1]}}(\lambda \pi_{\mathbf{0}} \parallel \pi_{\boldsymbol{\delta}})$  increases as  $|\delta_i|$  becomes larger for every dimension  $i$ .

**Theorem 4.** Suppose  $\pi_{\mathbf{0}}(\mathbf{z}) \propto \|\mathbf{z}\|_{\infty}^{-k_1} \|\mathbf{z}\|_2^{-k_2} \exp \left( -\frac{\|\mathbf{z}\|_2^2}{2\sigma^2} \right)$ , for some  $k_1, k_2 \geq 0$  and  $\sigma > 0$ , for any  $\lambda \geq 0$  we have

$$\text{sgn}(\delta_i) \frac{\partial}{\partial \delta_i} \mathbb{D}_{\mathcal{F}_{[0,1]}}(\lambda \pi_{\mathbf{0}} \parallel \pi_{\boldsymbol{\delta}}) \geq 0,$$

for any  $i \in \{1, 2, \dots, d\}$ .

Theorem 2 and 3 directly follows the above theorem. Notice that in Theorem 2, as our distribution is spherical symmetry, it is equivalent to set  $\mathcal{B} = \{\boldsymbol{\delta} : \boldsymbol{\delta} = [a, 0, \dots, 0]^{\top}, a \leq r\}$  by rotating the axis.

*Proof.* Given  $\lambda, k_1$  and  $k_2$ , we define  $\phi_1(s) = s^{-k_1}$ ,  $\phi_2(s) = s^{-k_2} e^{-\frac{s^2}{\sigma^2}}$ . Notice that  $\phi_1$  and  $\phi_2$  are monotone decreasing for non-negative  $s$ . By the symmetry, without loss of generality, we assume  $\boldsymbol{\delta} = [\delta_1, \dots, \delta_d]^{\top}$  for  $\delta_i \geq 0, i \in [d]$ . Notice that

$$\begin{aligned} \frac{\partial}{\partial \delta_i} \|\mathbf{x}_0 - \boldsymbol{\delta}\|_{\infty} &= \mathbb{I}\{\|\mathbf{x}_0 - \boldsymbol{\delta}\|_{\infty} = |x_i - \delta_i|\} \frac{\partial}{\partial \delta_i} \sqrt{(x_i - \delta_i)^2} \\ &= \mathbb{I}\{\|\mathbf{x}_0 - \boldsymbol{\delta}\|_{\infty} = |x_i - \delta_i|\} \frac{-(x_i - \delta_i)}{\|\mathbf{x}_0 - \boldsymbol{\delta}\|_{\infty}}. \end{aligned}$$

And also

$$\begin{aligned}\frac{\partial}{\partial \delta_i} \|\mathbf{x}_0 - \boldsymbol{\mu}\|_2 &= \frac{\partial}{\partial \delta_i} \sqrt{\sum_i (x_i - \mu_i)^2} \\ &= \frac{-(x_i - \mu_i)}{\|\mathbf{x}_0 - \boldsymbol{\mu}\|_2}.\end{aligned}$$

We thus have

$$\begin{aligned}& \frac{\partial}{\partial \delta_1} \int (\lambda \pi_0(\mathbf{x}_0) - \pi_\delta(\mathbf{x}_0))_+ d\mathbf{x}_0 \\ &= - \int \mathbb{I}\{\lambda \pi_0(\mathbf{x}_0) \geq \pi_\delta(\mathbf{x}_0)\} \frac{\partial}{\partial \delta_1} \pi_\delta(\mathbf{x}_0) d\mathbf{x}_0 \\ &= \int \mathbb{I}\{\lambda \pi_0(\mathbf{x}_0) \geq \pi_\delta(\mathbf{x}_0)\} F_1(\|\mathbf{x}_0 - \boldsymbol{\delta}\|_\infty, \|\mathbf{x}_0 - \boldsymbol{\delta}\|_2) d\mathbf{x}_0 \\ &= \int \mathbb{I}\{\lambda \pi_0(\mathbf{x}_0) \geq \pi_\delta(\mathbf{x}_0), x_1 > \delta_1\} F_1(\|\mathbf{x}_0 - \boldsymbol{\delta}\|_\infty, \|\mathbf{x}_0 - \boldsymbol{\delta}\|_2) d\mathbf{x}_0 \\ &\quad + \int \mathbb{I}\{\lambda \pi_0(\mathbf{x}_0) \geq \pi_\delta(\mathbf{x}_0), x_1 < \delta_1\} F_1(\|\mathbf{x}_0 - \boldsymbol{\delta}\|_\infty, \|\mathbf{x}_0 - \boldsymbol{\delta}\|_2) d\mathbf{x}_0,\end{aligned}$$

where we define

$$\begin{aligned}F_1(\|\mathbf{x}_0 - \boldsymbol{\delta}\|_\infty, \|\mathbf{x}_0 - \boldsymbol{\delta}\|_2) &= \phi'_1(\|\mathbf{x}_0 - \boldsymbol{\delta}\|_\infty) \phi_2(\|\mathbf{x}_0 - \boldsymbol{\delta}\|_2) \mathbb{I}\{\|\mathbf{x}_0 - \boldsymbol{\delta}\|_\infty = |x_1 - \delta_1|\} \frac{(x_1 - \delta_1)}{\|\mathbf{x}_0 - \boldsymbol{\delta}\|_\infty} \\ &\quad + \phi_1(\|\mathbf{x}_0 - \boldsymbol{\delta}\|_\infty) \phi'_2(\|\mathbf{x}_0 - \boldsymbol{\delta}\|_2) \frac{(x_1 - \delta_1)}{\|\mathbf{x}_0 - \boldsymbol{\delta}\|_2}.\end{aligned}$$

Notice that as  $\phi'_1 \leq 0$  and  $\phi'_2 \leq 0$  and we have

$$\begin{aligned}& \int \mathbb{I}\{\lambda \pi_0(\mathbf{x}_0) \geq \pi_\delta(\mathbf{x}_0), x_1 > \delta_1\} F_1(\|\mathbf{x}_0 - \boldsymbol{\delta}\|_\infty, \|\mathbf{x}_0 - \boldsymbol{\delta}\|_2) d\mathbf{x}_0 \leq 0 \\ & \int \mathbb{I}\{\lambda \pi_0(\mathbf{x}_0) \geq \pi_\delta(\mathbf{x}_0), x_1 < \delta_1\} F_1(\|\mathbf{x}_0 - \boldsymbol{\delta}\|_\infty, \|\mathbf{x}_0 - \boldsymbol{\delta}\|_2) d\mathbf{x}_0 \geq 0.\end{aligned}$$

Our target is to prove that  $\frac{\partial}{\partial \delta_1} \int (\lambda \pi_0(\mathbf{x}_0) - \pi_\delta(\mathbf{x}_0))_+ d\mathbf{x}_0 \geq 0$ . Now define the set

$$\begin{aligned}H_1 &= \{\mathbf{x}_0 : \lambda \pi_0(\mathbf{x}_0) \geq \pi_\delta(\mathbf{x}_0), x_1 > \delta_1\} \\ H_2 &= \{[2\delta_1 - x_1, x_2, \dots, x_d]^\top : \mathbf{x}_0 = [x_1, \dots, x_d]^\top \in H_1\}.\end{aligned}$$

Here the set  $H_2$  is defined as a image of a bijection

$$\text{proj}(\mathbf{x}_0) = [2\delta_1 - x_1, x_2, \dots, x_d]^\top = \tilde{\mathbf{x}}_0,$$

that is constrained on the set  $H_1$ . Notice that under our definition,

$$\begin{aligned}& \int \mathbb{I}\{\lambda \pi_0(\mathbf{x}_0) \geq \pi_\delta(\mathbf{x}_0), x_1 > \delta_1\} F_1(\|\mathbf{x}_0 - \boldsymbol{\delta}\|_\infty, \|\mathbf{x}_0 - \boldsymbol{\delta}\|_2) d\mathbf{x}_0 \\ &= \int_{H_1} F_1(\|\mathbf{x}_0 - \boldsymbol{\delta}\|_\infty, \|\mathbf{x}_0 - \boldsymbol{\delta}\|_2) d\mathbf{x}_0.\end{aligned}$$

Now we prove that

$$\begin{aligned}& \int \mathbb{I}\{\lambda \pi_0(\mathbf{x}_0) \geq \pi_\delta(\mathbf{x}_0), x_1 < \delta_1\} F_1(\|\mathbf{x}_0 - \boldsymbol{\delta}\|_\infty, \|\mathbf{x}_0 - \boldsymbol{\delta}\|_2) d\mathbf{x}_0 \\ &\stackrel{(1)}{\geq} \int_{H_2} F_1(\|\mathbf{x}_0 - \boldsymbol{\delta}\|_\infty, \|\mathbf{x}_0 - \boldsymbol{\delta}\|_2) d\mathbf{x}_0 \\ &\stackrel{(2)}{=} \left| \int_{H_1} F_1(\|\mathbf{x}_0 - \boldsymbol{\delta}\|_\infty, \|\mathbf{x}_0 - \boldsymbol{\delta}\|_2) d\mathbf{x}_0 \right|.\end{aligned}$$

**Property of the projection** Before we prove the (1) and (2), we give the following property of the defined projection function. For any  $\tilde{\mathbf{x}}_0 = \text{proj}(\mathbf{x}_0)$ ,  $\mathbf{x}_0 \in H_1$ , we have

$$\begin{aligned}\|\mathbf{x}_0 - \boldsymbol{\delta}\|_\infty &= \|\tilde{\mathbf{x}}_0 - \boldsymbol{\delta}\|_\infty \\ \|\mathbf{x}_0 - \boldsymbol{\delta}\|_2 &= \|\tilde{\mathbf{x}}_0 - \boldsymbol{\delta}\|_2 \\ \|\mathbf{x}_0\|_2 &\geq \|\tilde{\mathbf{x}}_0\|_2 \\ \|\mathbf{x}_0\|_\infty &\geq \|\tilde{\mathbf{x}}_0\|_\infty.\end{aligned}$$

This is because

$$\begin{aligned}\tilde{x}_i &= x_i, i \in [d] - \{1\} \\ \tilde{x}_1 &= 2\delta_1 - x_1,\end{aligned}$$

and by the fact that  $x_1 \geq \delta_1 \geq 0$ , we have  $|\tilde{x}_1| \leq |x_1|$  and  $|\tilde{x}_1 - \delta_1| \leq |x_1 - \delta_1|$ .

**Proof of Equality (2)** By the fact that  $\text{proj}$  is bijective constrained on the set  $H_1$  and the property of  $\text{proj}$ , we have

$$\begin{aligned}& \int_{H_2} F_1(\|\tilde{\mathbf{x}}_0 - \boldsymbol{\delta}\|_\infty, \|\tilde{\mathbf{x}}_0 - \boldsymbol{\delta}\|_2) d\tilde{\mathbf{x}}_0 \\ &= \int_{H_2} \phi'_1(\|\tilde{\mathbf{x}}_0 - \boldsymbol{\delta}\|_\infty) \phi_2(\|\tilde{\mathbf{x}}_0 - \boldsymbol{\delta}\|_2) \mathbb{I}\{\|\tilde{\mathbf{x}}_0 - \boldsymbol{\delta}\|_\infty = |\tilde{x}_1 - \delta_1|\} \frac{(\tilde{x}_1 - \delta_1)}{\|\tilde{\mathbf{x}}_0 - \boldsymbol{\delta}\|_\infty} d\tilde{\mathbf{x}}_0 \\ &+ \int_{H_2} \phi_1(\|\tilde{\mathbf{x}}_0 - \boldsymbol{\delta}\|_\infty) \phi'_2(\|\tilde{\mathbf{x}}_0 - \boldsymbol{\delta}\|_2) \frac{(\tilde{x}_1 - \delta_1)}{\|\tilde{\mathbf{x}}_0 - \boldsymbol{\delta}\|_2} d\tilde{\mathbf{x}}_0 \\ &\stackrel{(*)}{=} \int_{H_1} \phi'_1(\|\mathbf{x}_0 - \boldsymbol{\delta}\|_\infty) \phi_2(\|\mathbf{x}_0 - \boldsymbol{\delta}\|_2) \mathbb{I}\{\|\mathbf{x}_0 - \boldsymbol{\delta}\|_\infty = |x_1 - \delta_1|\} \frac{(\delta_1 - x_1)}{\|\mathbf{x}_0 - \boldsymbol{\delta}\|_\infty} |\det(\mathbf{J})| d\mathbf{x}_0 \\ &+ \int_{H_1} \phi_1(\|\mathbf{x}_0 - \boldsymbol{\delta}\|_\infty) \phi'_2(\|\mathbf{x}_0 - \boldsymbol{\delta}\|_2) \frac{(\delta_1 - x_1)}{\|\mathbf{x}_0 - \boldsymbol{\delta}\|_2} d\mathbf{x}_0 \\ &= - \int_{H_1} F_1(\|\mathbf{x}_0 - \boldsymbol{\delta}\|_\infty, \|\mathbf{x}_0 - \boldsymbol{\delta}\|_2) d\mathbf{x}_0,\end{aligned}$$

where  $(*)$  is by change of variable  $\tilde{\mathbf{x}}_0 = \text{proj}(\mathbf{x}_0)$  and  $\mathbf{J}$  is the Jacobian matrix  $\mathbf{J} =$

$$\begin{bmatrix} -1 & 0 & \cdots & 0 \\ 0 & 1 & \cdots & 0 \\ \vdots & \vdots & \ddots & \vdots \\ 0 & 0 & \cdots & 1 \end{bmatrix} \text{ and here we have the fact that } \tilde{x}_1 - \delta_1 = (2\delta_1 - x_1) - \delta_1 = -(x_1 - \delta_1).$$

**Proof of Inequality (1)** This can be done by verifying that  $H_2 \subseteq \{\mathbf{x}_0 : \lambda\pi_0(\mathbf{x}_0) \geq \pi_\delta(\mathbf{x}_0), x_1 < \delta_1\}$ . By the property of the projection, for any  $\mathbf{x}_0 \in H_1$ , let  $\tilde{\mathbf{x}}_0 = \text{proj}(\mathbf{x}_0)$ , then  $\lambda\pi_0(\tilde{\mathbf{x}}_0) \geq \lambda\pi_0(\mathbf{x}_0) \geq \pi_\delta(\mathbf{x}_0) = \pi_\delta(\tilde{\mathbf{x}}_0)$  (by the fact that  $\phi_1$  and  $\phi_2$  are monotone decreasing). It implies that for any  $\tilde{\mathbf{x}}_0 \in H_2$ , we have  $\lambda\pi_0(\tilde{\mathbf{x}}_0) \geq \pi_\delta(\tilde{\mathbf{x}}_0)$  and thus  $H_2 \subseteq \{\mathbf{x}_0 : \pi_0(\mathbf{x}_0) \geq \pi_\delta(\mathbf{x}_0), x_1 < \delta_1\}$ .

**Final statement** By the above result, we have

$$\frac{\partial}{\partial \delta_1} \int (\lambda\pi_0(\mathbf{x}_0) - \pi_\delta(\mathbf{x}_0))_+ d\mathbf{x}_0 \geq 0,$$

and the same result holds for any  $\frac{\partial}{\partial \delta_i} \int (\lambda\pi_0(\mathbf{x}_0) - \pi_\delta(\mathbf{x}_0))_+ d\mathbf{x}_0, i \in [d]$ , which implies our result.  $\square$

#### A.4.2 Proof for $\ell_1$ case

Slightly different for former cases, apart from proving  $\frac{\partial}{\partial \delta_i} \mathbb{D}_{\mathcal{F}_{[0,1]}}(\lambda\pi_0 \parallel \pi_\delta) \geq 0$  for  $\forall \delta_i \geq 0$ , we also need to demonstrate

**Theorem 5.** Suppose  $\pi_0(\mathbf{x}_0) \propto \|\mathbf{x}_0\|^{-k} \exp\left(-\frac{\|\mathbf{x}_0\|_1}{b}\right)$ , then for  $\boldsymbol{\delta} = (r, d - r, \delta_3, \delta_4, \dots)$  and  $\tilde{\boldsymbol{\delta}} = (0, d, \delta_3, \delta_4, \dots)$ ,  $0 < r < d$ , we have

$$\mathbb{D}_{\mathcal{F}_{[0,1]}}(\lambda\pi_0 \parallel \pi_\delta) \geq \mathbb{D}_{\mathcal{F}_{[0,1]}}(\lambda\pi_0 \parallel \pi_{\tilde{\boldsymbol{\delta}}})$$

*Proof.* We turn to show that

$$\frac{\partial}{\partial r} \mathbb{D}_{\mathcal{F}_{[0,1]}}(\lambda\pi_{\mathbf{0}} \parallel \pi_{\boldsymbol{\delta}}) \leq 0,$$

for  $\boldsymbol{\delta} = (r, d-r, \delta_3, \delta_4, \dots)$  and  $r < d/2$ . We define  $\phi(s) = s^{-k} \exp(-\frac{s}{b})$ . With

$$\frac{\partial}{\partial \delta_i} \|\mathbf{x}_0 - \boldsymbol{\delta}\|_1 = \frac{\partial}{\partial \delta_i} |x_i - \delta_i| = -\text{sgn}(x_i - \delta_i) = \frac{\delta_i - x_i}{|x_i - \delta_i|},$$

We have

$$\begin{aligned} & \frac{\partial}{\partial r} \mathbb{D}_{\mathcal{F}_{[0,1]}}(\lambda\pi_{\mathbf{0}} \parallel \pi_{\boldsymbol{\delta}}) \\ &= - \int \mathbb{I}\{\lambda\pi_{\mathbf{0}}(\mathbf{x}_0) \geq \pi_{\boldsymbol{\delta}}(\mathbf{x}_0)\} \frac{\partial}{\partial r} \pi_{\boldsymbol{\delta}}(\mathbf{x}_0) d\mathbf{x}_0 \\ &= \int \mathbb{I}\{\lambda\pi_{\mathbf{0}}(\mathbf{x}_0) \geq \pi_{\boldsymbol{\delta}}(\mathbf{x}_0)\} F(\mathbf{x}_0) d\mathbf{x}_0, \end{aligned}$$

where

$$\begin{aligned} F(\mathbf{x}_0) &= -\frac{\partial}{\partial r} \phi(\|\mathbf{x}_0 - \boldsymbol{\delta}\|_1) = -\phi'(\|\mathbf{x}_0 - \boldsymbol{\delta}\|_1) \frac{\partial}{\partial r} \|\mathbf{x}_0 - \boldsymbol{\delta}\|_1 \\ &= \phi'(\|\mathbf{x}_0 - \boldsymbol{\delta}\|_1) \frac{\partial}{\partial r} (|x_1 - r| + |x_2 - d + r|) \\ &= \phi'(\|\mathbf{x}_0 - \boldsymbol{\delta}\|_1) \cdot (\text{sgn}(x_1 - r) + \text{sgn}(d - x_2 - r)). \end{aligned}$$

Thus the original derivative becomes

$$\begin{aligned} &= \int \mathbb{I}\{\lambda\pi_{\mathbf{0}}(\mathbf{x}_0) \geq \pi_{\boldsymbol{\delta}}(\mathbf{x}_0), x_1 > r, x_2 < d - r\} F(\mathbf{x}_0) d\mathbf{x}_0 \\ &+ \int \mathbb{I}\{\lambda\pi_{\mathbf{0}}(\mathbf{x}_0) \geq \pi_{\boldsymbol{\delta}}(\mathbf{x}_0), x_1 > r, x_2 > d - r\} F(\mathbf{x}_0) d\mathbf{x}_0 \\ &+ \int \mathbb{I}\{\lambda\pi_{\mathbf{0}}(\mathbf{x}_0) \geq \pi_{\boldsymbol{\delta}}(\mathbf{x}_0), x_1 < r, x_2 > d - r\} F(\mathbf{x}_0) d\mathbf{x}_0 \\ &+ \int \mathbb{I}\{\lambda\pi_{\mathbf{0}}(\mathbf{x}_0) \geq \pi_{\boldsymbol{\delta}}(\mathbf{x}_0), x_1 < r, x_2 < d - r\} F(\mathbf{x}_0) d\mathbf{x}_0 \\ &= 2 \int \mathbb{I}\{\lambda\pi_{\mathbf{0}}(\mathbf{x}_0) \geq \pi_{\boldsymbol{\delta}}(\mathbf{x}_0), x_1 > r, x_2 < d - r\} \phi'(\|\mathbf{x}_0 - \boldsymbol{\delta}\|_1) d\mathbf{x}_0 \\ &- 2 \int \mathbb{I}\{\lambda\pi_{\mathbf{0}}(\mathbf{x}_0) \geq \pi_{\boldsymbol{\delta}}(\mathbf{x}_0), x_1 < r, x_2 > d - r\} \phi'(\|\mathbf{x}_0 - \boldsymbol{\delta}\|_1) d\mathbf{x}_0 \end{aligned}$$

We only need to show that

$$\begin{aligned} & \int \mathbb{I}\{\lambda\pi_{\mathbf{0}}(\mathbf{x}_0) \geq \pi_{\boldsymbol{\delta}}(\mathbf{x}_0), x_1 > r, x_2 < d - r\} \phi'(\|\mathbf{x}_0 - \boldsymbol{\delta}\|_1) d\mathbf{x}_0 \geq \\ & \int \mathbb{I}\{\lambda\pi_{\mathbf{0}}(\mathbf{x}_0) \geq \pi_{\boldsymbol{\delta}}(\mathbf{x}_0), x_1 < r, x_2 > d - r\} \phi'(\|\mathbf{x}_0 - \boldsymbol{\delta}\|_1) d\mathbf{x}_0. \end{aligned}$$

Notice that  $r < d/2$ , therefore this can be proved with a similar projection  $\mathbf{x}_0 \mapsto \tilde{\mathbf{x}}_0$ :

$$(x_1, x_2, x_3, x_4, \dots) \mapsto (2r - x_1, 2d - 2r - x_2, x_3, x_4, \dots)$$

and the similar deduction as previous theorem. □

## A.5 Theoretical Demonstration about the Ineffitivity of Equation (12)

**Theorem 6.** Consider the adversarial attacks on the  $\ell_\infty$  ball  $\mathcal{B}_{\ell_\infty, r} = \{\boldsymbol{\delta} : \|\boldsymbol{\delta}\|_\infty \leq r\}$ . Suppose we use the smoothing distribution  $\pi_{\mathbf{0}}$  in Equation (12) and choose the parameters  $(k, \sigma)$  such that

1)  $\|z\|_\infty$  is stochastic bounded when  $z \sim \pi_0$ , in that for any  $\epsilon > 0$ , there exists a finite  $M > 0$  such that  $\mathbb{P}_{\pi_0}(\|z\|_\infty > M) \leq \epsilon$ ;

2) the mode of  $\|z\|_\infty$  under  $\pi_0$  equals  $Cr$ , where  $C$  is some fixed positive constant,

then for any  $\epsilon \in (0, 1)$  and sufficiently large dimension  $d$ , there exists a constant  $t > 1$ , such that, we have

$$\max_{\delta \in \mathcal{B}_{\ell_\infty, r}} \left\{ \mathbb{D}_{\mathcal{F}_{[0,1]}}(\lambda \pi_0 \parallel \pi_\delta) \right\} \geq (1 - \epsilon) (\lambda - \mathcal{O}(t^{-d})).$$

This shows that, in very high dimensions, the maximum distance term is arbitrarily close to  $\lambda$  which is the maximum possible value of  $\mathbb{D}_{\mathcal{F}_{[0,1]}}(\lambda \pi_0 \parallel \pi_\delta)$  (see Theorem 1). In particular, this implies that in high dimensional scenario, once  $f_{\pi_0}^\#(x_0) \leq (1 - \epsilon)$  for some small  $\epsilon$ , we have  $\mathcal{L}_{\pi_0}(\mathcal{F}_{[0,1]}, \mathcal{B}_{\ell_\infty, r}) = \mathcal{O}(t^{-d})$  and thus fail to certify.

**Remark** The condition 1) and 2) in Theorem 6 are used to ensure that the magnitude of the random perturbations generated by  $\pi_0$  is within a reasonable range such that the value of  $f_{\pi_0}^\#(x_0)$  is not too small, in order to have a high accuracy in the trade-off in Equation (9). Note that the natural images are often contained in cube  $[0, 1]^d$ . If  $\|z\|_\infty$  is too large to exceed the region of natural images, the accuracy will be obviously rather poor. Note that if we use variants of Gaussian distribution, we only need  $\|z\|_2/\sqrt{d}$  to be not too large. Theorem 6 says that once  $\|z\|_\infty$  is in a reasonably small scale, the maximum distance term must be unreasonably large in high dimensions, yielding a vacuous lower bound.

*Proof.* First notice that the distribution of  $z$  can be factorized by the following hierarchical scheme:

$$\begin{aligned} a &\sim \pi_R(a) \propto a^{d-1-k} e^{-\frac{a^2}{2\sigma^2}} \mathbb{I}\{a \geq 0\} \\ \mathbf{s} &\sim \text{Unif}^{\otimes d}(-1, 1) \\ z &\leftarrow \frac{\mathbf{s}}{\|\mathbf{s}\|_\infty} a. \end{aligned}$$

Without loss of generality, we assume  $\delta^* = [r, \dots, r]^\top$ . (see Theorem 4)

$$\mathbb{D}_{\mathcal{F}_{[0,1]}}(\lambda \pi_0 \parallel \pi_{\delta^*}) = \mathbb{E}_{z \sim \pi_0} \left( \lambda - \frac{\pi_\delta(z)}{\pi_0} \right)_+.$$

Notice that as the distribution is symmetry,

$$\mathbb{P}_{\pi_0}(\|z + \delta^*\|_\infty = a + r \mid \|z\|_\infty = a) = \frac{1}{2}.$$

Define  $|z|^{(i)}$  is the  $i$ -th order statistics of  $|z_j|$ ,  $j = 1, \dots, d$  conditioning on  $\|z\|_\infty = a$ . By the factorization above and some algebra, we have, for any  $\epsilon \in (0, 1)$ ,

$$\mathbb{P} \left( \frac{|z|^{(d-1)}}{|z|^{(d)}} > (1 - \epsilon) \mid \|z\|_\infty = a \right) \geq 1 - (1 - \epsilon)^{d-1}.$$

And  $\frac{|z|^{(d-1)}}{|z|^{(d)}} \perp |z|^{(d)}$ . Now we estimate  $\mathbb{D}_{\mathcal{F}_{[0,1]}}(\lambda \pi_0 \parallel \pi_{\delta^*})$ .

$$\begin{aligned} &\mathbb{E}_{z \sim \pi_0} \left( \lambda - \frac{\pi_\delta(z)}{\pi_0} \right)_+ \\ &= \mathbb{E}_a \mathbb{E}_{z \sim \pi_0} \left[ \left( \lambda - \frac{\pi_\delta(z)}{\pi_0} \right)_+ \mid \|z\|_\infty = a \right] \\ &= \frac{1}{2} \mathbb{E}_a \mathbb{E}_{z \sim \pi_0} \left[ \left( \lambda - \frac{\pi_\delta(z)}{\pi_0} \right)_+ \mid \|z\|_\infty = a, \|z + \delta^*\|_\infty = a + r \right] \\ &\quad + \frac{1}{2} \mathbb{E}_a \mathbb{E}_{z \sim \pi_0} \left[ \left( \lambda - \frac{\pi_\delta(z)}{\pi_0} \right)_+ \mid \|z\|_\infty = a, \|z + \delta^*\|_\infty \neq a + r \right]. \end{aligned}$$



Conditioning on  $\|\mathbf{z}\|_\infty = a, \|\mathbf{z} + \boldsymbol{\delta}^*\|_\infty = a + r$ , we have

$$\begin{aligned}\frac{\pi_{\boldsymbol{\delta}}}{\pi_{\mathbf{0}}}(\mathbf{z}) &= \left(\frac{1}{1 + \frac{r}{a}}\right)^k e^{-\frac{1}{2\sigma^2}(2ra+r^2)} \\ &= \left(\frac{1}{1 + \frac{r}{a}}\right)^k e^{-\frac{d-1-k}{2C^2}\left(2\frac{a}{r}+1\right)}.\end{aligned}$$

Here the second equality is because we choose  $\text{mode}(\|\mathbf{z}\|_\infty) = Cr$ , which implies that  $\sqrt{d-1-k}\sigma = Cr$ . And thus we have

$$\begin{aligned}&\mathbb{E}_a \mathbb{E}_{\mathbf{z} \sim \pi_{\mathbf{0}}} \left[ \left( \lambda - \frac{\pi_{\boldsymbol{\delta}}}{\pi_{\mathbf{0}}}(\mathbf{z}) \right)_+ \mid \|\mathbf{z}\|_\infty = a, \|\mathbf{z} + \boldsymbol{\delta}^*\|_\infty = a + r \right] \\ &= \int \left( \lambda - \left( \frac{1}{1 + \frac{r}{a}} \right)^k e^{-\frac{d-1-k}{2C^2}\left(2\frac{a}{r}+1\right)} \right)_+ \pi(a) da \\ &= \int \left( \lambda - \left( 1 + \frac{r}{a} \right)^{-k} \left( e^{\frac{2a/r+1}{2C^2}} \right)^{-(d-1-k)} \right)_+ \pi(a) da \\ &= \lambda - \mathcal{O}(t^{-d}),\end{aligned}$$

for some  $t > 1$ . Here the last equality is by the assumption that  $\|\mathbf{z}\|_\infty = \mathcal{O}_p(1)$ .

Next we bound the second term  $\mathbb{E}_a \mathbb{E}_{\mathbf{z} \sim \pi_{\mathbf{0}}} \left[ \left( \lambda - \frac{\pi_{\boldsymbol{\delta}}}{\pi_{\mathbf{0}}}(\mathbf{z}) \right)_+ \mid \|\mathbf{z}\|_\infty = a, \|\mathbf{z} + \boldsymbol{\delta}^*\|_\infty \neq a + r \right]$ . By the property of uniform distribution, we have

$$\begin{aligned}&\mathbb{P} \left( \frac{|\mathbf{z}|^{(d-1)}}{|\mathbf{z}|^{(d)}} > (1 - \epsilon) \mid \|\mathbf{z}\|_\infty = a, \|\mathbf{z} + \boldsymbol{\delta}^*\|_\infty \neq a + r \right) \\ &= \mathbb{P} \left( \frac{|\mathbf{z}|^{(d-1)}}{|\mathbf{z}|^{(d)}} > (1 - \epsilon) \mid \|\mathbf{z}\|_\infty = a \right) \\ &\geq 1 - (1 - \epsilon)^{d-1}.\end{aligned}$$

And thus, for any  $\epsilon \in [0, 1)$ ,

$$\mathbb{P} \left( \|\mathbf{z} + \boldsymbol{\delta}^*\|_\infty \geq ((1 - \epsilon)a + r)^2 \mid \|\mathbf{z}\|_\infty = a, \|\mathbf{z} + \boldsymbol{\delta}^*\|_\infty \neq a + r \right) \geq \frac{1}{2} (1 - (1 - \epsilon)^{d-1}).$$

It implies that

$$\begin{aligned}&\mathbb{E}_{\mathbf{z} \sim \pi_{\mathbf{0}}} \left[ \left( \lambda - \frac{\pi_{\boldsymbol{\delta}}}{\pi_{\mathbf{0}}}(\mathbf{z}) \right)_+ \mid \|\mathbf{z}\|_\infty = a, \|\mathbf{z} + \boldsymbol{\delta}^*\|_\infty = a + r \right] \\ &\geq \frac{1}{2} (1 - (1 - \epsilon)^{d-1}) \left( \lambda - \left( 1 - \epsilon + \frac{r}{a} \right)^{-k} e^{-\frac{1}{2\sigma^2}(\epsilon(\epsilon-2)a^2 + 2r(1-\epsilon)a + r^2)} \right)_+ \\ &= \frac{1}{2} (1 - (1 - \epsilon)^{d-1}) \left( \lambda - \left( 1 - \epsilon + \frac{r}{a} \right)^{-k} e^{-\frac{d-1-k}{2C^2}(\epsilon(\epsilon-2)a^2/r^2 + 2(1-\epsilon)a/r + 1)} \right)_+.\end{aligned}$$

For any  $\epsilon' \in (0, 1)$ , by choosing  $\epsilon = \frac{\log(2/\epsilon')}{d-1}$ , for large enough  $d$ , we have

$$\begin{aligned}&\mathbb{E}_{\mathbf{z} \sim \pi_{\mathbf{0}}} \left[ \left( \lambda - \frac{\pi_{\boldsymbol{\delta}}}{\pi_{\mathbf{0}}}(\mathbf{z}) \right)_+ \mid \|\mathbf{z}\|_\infty = a, \|\mathbf{z} + \boldsymbol{\delta}^*\|_\infty = a + r \right] \\ &\geq \frac{1}{2} (1 - (1 - \epsilon)^{d-1}) \left( \lambda - \left( 1 - \epsilon + \frac{r}{a} \right)^{-k} e^{-\frac{d-1-k}{2C^2}(2(1-\epsilon)a/r+1)} e^{\frac{a^2 \log(2/\epsilon')}{C^2 r^2}} \right)_+ \\ &= \frac{1}{2} \left( 1 - \left( 1 - \frac{\log(2/\epsilon')}{d-1} \right)^{d-1} \right) \left( \lambda - \left( 1 - \frac{\log(2/\epsilon')}{d-1} + \frac{r}{a} \right)^{-k} e^{-\frac{d-1-k}{2C^2}(2(1-\epsilon)a/r+1)} e^{\frac{a^2 \log(2/\epsilon')}{C^2 r^2}} \right)_+ \\ &\geq \frac{1}{2} (1 - \epsilon') \left( \lambda - \left( 1 - \epsilon + \frac{r}{a} \right)^{-k} e^{-\frac{d-1-k}{2C^2}(2(1-\epsilon)a/r+1)} e^{\frac{a^2 \log(2/\epsilon')}{C^2 r^2}} \right)_+.\end{aligned}$$

Thus we have

$$\begin{aligned} & \frac{1}{2} \mathbb{E}_a \mathbb{E}_{z \sim \pi_0} \left[ \left( \lambda - \frac{\pi_{\delta}}{\pi_0}(z) \right)_+ \mid \|z\|_{\infty} = a, \|z + \delta^*\|_{\infty} \neq a + r \right] \\ &= \frac{1}{2} (1 - \epsilon') (\lambda - \mathcal{O}(t^{-d})). \end{aligned}$$

Combine the bounds, for large  $d$ , we have

$$\mathbb{D}_{\mathcal{F}_{[0,1]}}(\lambda \pi_0 \parallel \pi_{\delta^*}) = (1 - \epsilon') (\lambda - \mathcal{O}(t^{-d})).$$

□

## B More about Experiments

### B.1 Practical Algorithm

In this section, we give our algorithm for certification. Our target is to give a high probability bound for the solution of

$$\mathcal{L}_{\pi_0}(\mathcal{F}_{[0,1]}, \mathcal{B}_{\ell_{\infty}, r}) = \max_{\lambda \geq 0} \{ \lambda f_{\pi_0}^{\#} - \mathbb{D}_{\mathcal{F}_{[0,1]}}(\lambda \pi_0 \parallel \pi_{\delta}) \}$$

given some classifier  $f^{\#}$ . Following [9], the given classifier here has a binary output  $\{0, 1\}$ . Computing the above quantity requires us to evaluate both  $f_{\pi_0}^{\#}$  and  $\mathbb{D}_{\mathcal{F}_{[0,1]}}(\lambda \pi_0 \parallel \pi_{\delta})$ . A lower bound  $\hat{p}_0$  of the former term is obtained through binominal test as [9] do, while the second term can be estimated with arbitrary accuracy using Monte Carlo samples. We perform grid search to optimize  $\lambda$  and given  $\lambda$ , we draw  $N$  i.i.d. samples from the proposed smoothing distribution  $\pi_0$  to estimate  $\lambda f_{\pi_0}^{\#} - \mathbb{D}_{\mathcal{F}_{[0,1]}}(\lambda \pi_0 \parallel \pi_{\delta})$ . This can be achieved by the following importance sampling manner:

$$\begin{aligned} & \lambda f_{\pi_0}^{\#} - \mathbb{D}_{\mathcal{F}_{[0,1]}}(\lambda \pi_0 \parallel \pi_{\delta}) \\ & \geq \lambda \hat{p}_0 - \int \left( \lambda - \frac{\pi_{\delta}}{\pi_0}(z) \right)_+ \pi_0(z) dz \\ & \geq \lambda \hat{p}_0 - \frac{1}{N} \sum_{i=1}^N \left( \lambda - \frac{\pi_{\delta}}{\pi_0}(z_i) \right)_+ - \epsilon. \end{aligned}$$

And we use reject sampling to obtain samples from  $\pi_0$ . Notice that, we restrict the search space of  $\lambda$  to a finite compact set so the importance samples is bounded. Since the Monte Carlo estimation is not exact with an error  $\epsilon$ , we give a high probability concentration lower bound of the estimator. Algorithm 1 summarized our algorithm.

---

**Algorithm 1** Certification algorithm

---

**Input:** input image  $\mathbf{x}_0$ ; original classifier:  $f^\#$ ; smoothing distribution  $\pi_0$ ; radius  $r$ ; search interval  $[\lambda_{\text{start}}, \lambda_{\text{end}}]$  of  $\lambda$ ; search precision  $h$  for optimizing  $\lambda$ ; number of samples  $N_1$  for testing  $p_0$ ; pre-defined error threshold  $\epsilon$ ; significant level  $\alpha$ ;  
compute search space for  $\lambda$ :  $\Lambda = \text{range}(\lambda_{\text{start}}, \lambda_{\text{end}}, h)$   
compute  $N_2$ : number of Monte Carlo estimation given  $\epsilon$ ,  $\alpha$  and  $\Lambda$   
compute optimal disturb:  $\delta$  depends on specific setting  
**for**  $\lambda$  **in**  $\Lambda$  **do**  
    sample  $\mathbf{z}_1, \dots, \mathbf{z}_{N_1} \sim \pi_0$   
    compute  $n_1 = \frac{1}{N_1} \sum_{i=1}^{N_1} f^\#(\mathbf{x}_0 + \mathbf{z}_i)$   
    compute  $\hat{p}_0 = \text{LowerConfBound}(n_1, N_1, 1 - \alpha)$   
    sample  $\mathbf{z}_1, \dots, \mathbf{z}_{N_2} \sim \pi_0$   
    compute  $\hat{\mathbb{D}}_{\mathcal{F}_{[0,1]}}(\lambda\pi_0 \parallel \pi_\delta) = \frac{1}{N_2} \sum_{i=1}^{N_2} \left( \lambda - \frac{\pi_\delta(\mathbf{z}_i)}{\pi_0(\mathbf{z}_i)} \right)_+$   
    compute confidence lower bound  $b_\lambda = \lambda\hat{p}_0 - \hat{\mathbb{D}}_{\mathcal{F}_{[0,1]}}(\lambda\pi_0 \parallel \pi_\delta) - \epsilon$   
**end**  
**if**  $\max_{\lambda \in \Lambda} b_\lambda \geq 1/2$  **then**  
    |  $\mathbf{x}_0$  can be certified  
**else**  
    |  $\mathbf{x}_0$  cannot be certified  
**end**

---

The LowerConfBound function performs a binominal test as described in [9]. The  $\epsilon$  in Algorithm 1 is given by concentration inequality.

**Theorem 7.** Let  $h(z_1, \dots, z_N) = \frac{1}{N} \sum_{i=1}^N \left( \lambda - \frac{\pi_\delta(z_i)}{\pi_0(z_i)} \right)_+$ , we yield

$$\Pr\{|h(z_1, \dots, z_N) - \int (\lambda\pi_0(z) - \pi_\delta(z))_+ dz| \geq \epsilon\} \leq \exp\left(\frac{-2N\epsilon^2}{\lambda^2}\right).$$

*Proof.* Given *McDiarmid's Inequality*, which says

$$\sup_{x_1, x_2, \dots, x_n, \hat{x}_i} |h(x_1, x_2, \dots, x_n) - h(x_1, x_2, \dots, x_{i-1}, \hat{x}_i, x_{i+1}, \dots, x_n)| \leq c_i \quad \text{for } 1 \leq i \leq n,$$

we have  $c_i = \frac{\lambda}{N}$ , and then obtain

$$\Pr\{|h(z_1, \dots, z_N) - \int (\lambda\pi_0(z) - \pi_\delta(z))_+ dz| \geq \epsilon\} \leq \exp\left(\frac{-2N\epsilon^2}{\lambda^2}\right).$$

□

The above theorem tells us that, once  $\epsilon, \lambda, N$  is given, we can yield a bound with high-probability  $1 - \alpha$ . One can also get  $N$  when  $\epsilon, \lambda, \alpha$  is provided. Note that this is the same as the Hoeffding bound mentioned in Section 4.2 as Micdiarmid bound is a generalization of Hoeffding bound.

However, in practice we can use a small trick as below to certify with much less comupation:

---

**Algorithm 2** Practical certification algorithm

---

**Input:** input image  $\mathbf{x}_0$ ; original classifier:  $f^\#$ ; smoothing distribution  $\pi_0$ ; radius  $r$ ; search interval for  $\lambda$ :  $[\lambda_{\text{start}}, \lambda_{\text{end}}]$ ; search precision  $h$  for optimizing  $\lambda$ ; number of Monte Carlo for first estimation:  $N_1^0, N_2^0$ ; number of samples  $N_1$  for a second test of  $p_0$ ; pre-defined error threshold  $\epsilon$ ; significant level  $\alpha$ ; optimal perturbation  $\delta$  ( $\delta = [r, 0, \dots, 0]^\top$  for  $\ell_2$  attacking and  $\delta = [r, \dots, r]^\top$  for  $\ell_\infty$  attacking).

**for**  $\lambda$  **in**  $\Lambda$  **do**

- sample  $\mathbf{z}_1, \dots, \mathbf{z}_{N_1^0} \sim \pi_0$
- compute  $n_1^0 = \frac{1}{N_1^0} \sum_{i=1}^{N_1^0} f^\#(\mathbf{x}_0 + \mathbf{z}_i)$
- compute  $\hat{p}_0 = \text{LowerConfBound}(n_1^0, N_1^0, 1 - \alpha)$
- sample  $\mathbf{z}_1, \dots, \mathbf{z}_{N_2^0} \sim \pi_0$
- compute  $\hat{\mathbb{D}}_{\mathcal{F}_{[0,1]}}(\lambda \pi_0 \parallel \pi_\delta) = \frac{1}{N_2^0} \sum_{i=1}^{N_2^0} \left( \lambda - \frac{\pi_\delta}{\pi_0}(\mathbf{z}_i) \right)_+$
- compute confidence lower bound  $b_\lambda = \lambda \hat{p}_0 - \hat{\mathbb{D}}_{\mathcal{F}_{[0,1]}}(\lambda \pi_0 \parallel \pi_\delta)$

**end**

compute  $\hat{\lambda} = \arg \max_{\lambda \in \Lambda} b_\lambda$

compute  $N_2$ : number of Monte Carlo estimation given  $\epsilon, \alpha$  and  $\hat{\lambda}$

sample  $\mathbf{z}_1, \dots, \mathbf{z}_{N_1} \sim \pi_0$

compute  $n_1 = \frac{1}{N_1} \sum_{i=1}^{N_1} f^\#(\mathbf{x}_0 + \mathbf{z}_i)$

compute  $\hat{p}_0 = \text{LowerConfBound}(n_1, N_1, 1 - \alpha)$

sample  $\mathbf{z}_1, \dots, \mathbf{z}_{N_2} \sim \pi_0$

compute  $\hat{\mathbb{D}}_{\mathcal{F}_{[0,1]}}(\lambda \pi_0 \parallel \pi_\delta) = \frac{1}{N_2} \sum_{i=1}^{N_2} \left( \lambda - \frac{\pi_\delta}{\pi_0}(\mathbf{z}_i) \right)_+$

compute  $b = \hat{\lambda} \hat{p}_0 - \hat{\mathbb{D}}_{\mathcal{F}_{[0,1]}}(\lambda \pi_0 \parallel \pi_\delta) - \epsilon$

**if**  $b \geq 1/2$  **then**

- |  $\mathbf{x}_0$  can be certified

**else**

- |  $\mathbf{x}_0$  cannot be certified

**end**

---

Algorithm 2 allow one to begin with small  $N_1^0, N_2^0$  to obtain the first estimation and choose a  $\hat{\lambda}$ . Then a rigorous lower bound can be achieved with  $\hat{\lambda}$  with enough (i.e.  $N_1, N_2$ ) Monte Carlo samples.

## B.2 Experiment Settings

The details of our method are shown in the supplementary material. Since our method requires Monte Carlo approximation, we draw  $0.1M$  samples from  $\pi_0$  and construct  $\alpha = 99.9\%$  confidence lower bounds of that in Equation (9). The optimization on  $\lambda$  is solved using grid search. For  $\ell_2$  attacks, we set  $k = 500$  for CIFAR-10 and  $k = 50000$  for ImageNet in our non-Gaussian smoothing distribution Equation (11). If the used model was trained with a Gaussian perturbation noise of  $\mathcal{N}(0, \sigma_0^2)$ , then the  $\sigma$  parameter of our smoothing distribution is set to be  $\sqrt{(d-1)/(d-1-k)}\sigma_0$ , such that the expectation of the norm  $\|z\|_2$  under our non-Gaussian distribution Equation (11) matches with the norm of  $\mathcal{N}(0, \sigma_0^2)$ . For  $\ell_1$  situation, we keep the same rule for hyperparameter selection as  $\ell_2$  case, in order to make the norm of proposed distribution has the same mean with original distribution. For  $\ell_\infty$  situation, we set  $k = 250$  and  $\sigma$  also equals to  $\sqrt{(d-1)/(d-1-k)}\sigma_0$  for the mixed norm smoothing distribution Equation (13) just for consistency. More ablation study about  $k$  is deferred to Appendix B.3.

## B.3 Abalation Study

On CIFAR10, we also do ablation study to show the influence of different  $k$  for the  $\ell_2$  certification case as shown in Table 4.

| $\ell_2$ Radius | 0.25      | 0.5       | 0.75      | 1.0       | 1.25      | 1.5       | 1.75      | 2.0       | 2.25     |
|-----------------|-----------|-----------|-----------|-----------|-----------|-----------|-----------|-----------|----------|
| Baseline (%)    | 60        | 43        | 34        | 23        | 17        | 14        | 12        | 10        | 8        |
| $k = 100$ (%)   | 60        | 43        | 34        | 23        | 18        | 15        | 12        | 10        | 8        |
| $k = 200$ (%)   | 60        | 44        | 36        | 24        | 18        | 15        | 13        | 10        | 8        |
| $k = 500$ (%)   | <b>61</b> | <b>46</b> | <b>37</b> | <b>25</b> | <b>19</b> | <b>16</b> | 14        | 11        | <b>9</b> |
| $k = 1000$ (%)  | 59        | 44        | 36        | <b>25</b> | <b>19</b> | <b>16</b> | 14        | 11        | <b>9</b> |
| $k = 2000$ (%)  | 56        | 41        | 35        | 24        | <b>19</b> | <b>16</b> | <b>15</b> | <b>12</b> | <b>9</b> |

Table 4: Certified top-1 accuracy of the best classifiers on cifar10 at various  $\ell_2$  radius. We use the same model as [9] and do not train any new models.

## C Illumination about Bilateral Condition<sup>3</sup>

The results in the main context is obtained under binary classification setting. Here we show it has a natural generalization to multi-class classification setting. Suppose the given classifier  $f^\sharp$  classifies an input  $\mathbf{x}_0$  correctly to class A, i.e.,

$$f_A^\sharp(\mathbf{x}_0) > \max_{B \neq A} f_B^\sharp(\mathbf{x}_0) \quad (14)$$

where  $f_B^\sharp(\mathbf{x}_0)$  denotes the prediction confidence of any class  $B$  different from ground truth label  $A$ . Notice that  $f_A^\sharp(\mathbf{x}_0) + \sum_{B \neq A} f_B^\sharp(\mathbf{x}_0) = 1$ , so the necessary and sufficient condition for correct binary classification  $f_A^\sharp(\mathbf{x}_0) > 1/2$  becomes a *sufficient* condition for multi-class prediction.

Similarly, the necessary and sufficient condition for correct classification of the *smoothed* classifier is

$$\min_{f \in \mathcal{F}} \left\{ \mathbb{E}_{\mathbf{z} \sim \pi_0} [f_A(\mathbf{x}_0 + \boldsymbol{\delta} + \mathbf{z})] \quad \text{s.t.} \quad \mathbb{E}_{\pi_0} [f_A(\mathbf{x}_0)] = f_{\pi_0, A}^\sharp(\mathbf{x}_0) \right\} >$$

$$\max_{f \in \mathcal{F}} \left\{ \mathbb{E}_{\mathbf{z} \sim \pi_0} [f_B(\mathbf{x}_0 + \boldsymbol{\delta} + \mathbf{z})] \quad \text{s.t.} \quad \mathbb{E}_{\pi_0} [f_B(\mathbf{x}_0)] = f_{\pi_0, B}^\sharp(\mathbf{x}_0) \right\}$$

for  $\forall B \neq A$  and any perturbation  $\boldsymbol{\delta} \in \mathcal{B}$ . Writing out their Langragian forms makes things clear:

$$\max_{\lambda} \lambda f_{\pi_0, A}^\sharp(\mathbf{x}_0) - \mathbb{D}_{\mathcal{F}_{[0,1]}}(\lambda \pi_0 \parallel \pi_{\boldsymbol{\delta}}) > \min_{\lambda} \max_{B \neq A} \lambda f_{\pi_0, B}^\sharp(\mathbf{x}_0) + \mathbb{D}_{\mathcal{F}_{[0,1]}}(\pi_{\boldsymbol{\delta}} \parallel \lambda \pi_0)$$

Thus the overall necessary and sufficient condition is

$$\min_{\boldsymbol{\delta} \in \mathcal{B}} \left\{ \max_{\lambda} \left( \lambda f_{\pi_0, A}^\sharp(\mathbf{x}_0) - \mathbb{D}_{\mathcal{F}_{[0,1]}}(\lambda \pi_0 \parallel \pi_{\boldsymbol{\delta}}) \right) - \max_{B \neq A} \min_{\lambda} \left( \lambda f_{\pi_0, B}^\sharp(\mathbf{x}_0) + \mathbb{D}_{\mathcal{F}_{[0,1]}}(\pi_{\boldsymbol{\delta}} \parallel \lambda \pi_0) \right) \right\} > 0$$

Optimizing this *bilateral* object will *theoretically give a better certification result* than our method in main context, especially when the number of classes is large. But we do not use this bilateral formulation as reasons stated below.

When both  $\pi_0$  and  $\pi_{\boldsymbol{\delta}}$  are gaussian, which is [9]’s setting, this condition is equivalent to:

$$\min_{\boldsymbol{\delta} \in \mathcal{B}} \left\{ \Phi \left( \Phi^{-1}(f_{\pi_0, A}^\sharp(\mathbf{x}_0)) - \frac{\|\boldsymbol{\delta}\|_2}{\sigma} \right) - \max_{B \neq A} \Phi \left( \Phi^{-1}(f_{\pi_0, B}^\sharp(\mathbf{x}_0)) + \frac{\|\boldsymbol{\delta}\|_2}{\sigma} \right) \right\} > 0$$

$$\Leftrightarrow \Phi^{-1}(f_{\pi_0, A}^\sharp(\mathbf{x}_0)) - \frac{r}{\sigma} > \Phi^{-1}(f_{\pi_0, B}^\sharp(\mathbf{x}_0)) + \frac{r}{\sigma}, \quad \forall B \neq A$$

$$\Leftrightarrow r < \frac{\sigma}{2} \left( \Phi^{-1}(f_{\pi_0, A}^\sharp(\mathbf{x}_0)) - \Phi^{-1}(f_{\pi_0, B}^\sharp(\mathbf{x}_0)) \right), \quad \forall B \neq A$$

with a similar derivation process like Appendix A.3. This is exactly the same bound in the (restated) theorem 1 of [9].

[9] use  $1 - \underline{p}_A$  as a naive estimate of the upper bound of  $f_{\pi_0, B}^\sharp(\mathbf{x}_0)$ , where  $\underline{p}_A$  is a lower bound of  $f_{\pi_0, A}^\sharp(\mathbf{x}_0)$ . This leads the confidence bound decay to the bound one can get in binary case, i.e.,  $r \leq \sigma \Phi^{-1}(f_{\pi_0, A}^\sharp(\mathbf{x}_0))$ .

As the two important baselines [9, 10] do not take the bilateral form, we also do not use this form in experiments for fairness.

<sup>3</sup>In fact, the theoretical part of [15] share some similar discussion with this section.
